# Supplementary material
Source: publisher site journal article supplement (https://www.dovepress.com/article/348961)
Supplement: Supplementary file 1 [file get_supplementary_file.php]

***The critical information like platform, quality control, bioinformatics tools and the RNA sequencing data analysis (quality control, assembly, and mapping) were exhibited in the following parts.***

#### **Library preparation, and Illumina HiSeq xten Sequencing**

RNA-seq transcriptome library construction and sequencing were performed using the TruSeq™ RNA sample preparation kit according to the manufacturer's instructions (Illumina, San Diego, CA, USA) at Shanghai Majorbio Bio-pharm Biotechnology Co., Ltd. (Shanghai, China). Firstly, poly(A) mRNA was purified according to the polyA selection method by oligo(dT) beads and then fragmented by fragmentation buffer. Secondly, the SuperScript double-stranded cDNA synthesis kit (Invitrogen, CA, USA) served to synthesize double-stranded cDNA with random hexamer primers (Illumina). Then the synthesized cDNA was subjected to end-repair, phosphorylation and 'A' base addition according to Illumina's library construction protocol. Libraries were size selected for cDNA target fragments of 200–300 bp on 2% Low Range Ultra Agarose followed by PCR amplified using Phusion DNA polymerase (New England Biolabs, Boston, MA) for 15 PCR cycles. After being quantified by TBS380 fluorometer (Turner Biosystems, USA), the paired-end RNA-seq sequencing library was sequenced utilizing the Illumina HiSeq xten sequencer (2 × 150bp read length).

#### **Read mapping**

The raw paired end reads were trimmed and quality controlled by SeqPrep (<https://github.com/jstjohn/SeqPrep>) and Sickle (<https://github.com/najoshi/sickle>) with default parameters. Then clean reads were separately aligned to reference genome with orientation mode using TopHat (<http://tophat.cbcb.umd.edu/>, version 2.1.1) software. The mapping criteria was as follows: sequencing reads should be uniquely matched to the genome allowing up to 2 mismatches, without insertions or deletions. Then the region of genes was expanded following depths of sites and the operon was obtained. Furthermore, the whole genome was split into multiple 15k bp windows that share 5k bp. New transcribed regions were defined as more than 2 consecutive windows without overlapped region of gene, where at least 2 reads mapped per window in the same orientation.

#### **Gene Expression Analysis**

The data were analyzed on the free online platform of Majorbio Cloud Platform ([www.majorbio.com](http://www.majorbio.com)). Briefly, to identify the differentially expressed genes (DEGs) between the different skin samples, the expression level of each transcript was calculated according to the fragments per kilobase of exon per million mapped reads (FRKM) method. RSEM (<http://deweylab.biostat.wisc.edu/rsem/>) was used to quantify gene abundances [1]. Statistical analysis of DEGs was conducted using the DESeq2 package.

A *P* value and the fold change (FC) for each gene were calculated to denote its expression difference between libraries. The DEGs between the control and inflamed skin samples were screened using  $P < 0.01$  and  $|\log_2FC| > 3$  as the thresholds.

#### **RNA Sequencing Data Analysis: Quality Control, Assembly, and Mapping**

We analyzed the transcriptomes of the normal and *S. aureus*-infected skin samples via high-throughput RNA sequencing. Approximately 44.8 and 44.3 million raw reads were obtained from the control and model groups respectively. After removing low-quality reads, respectively 44.3 and 43.9 million high-quality reads from the control and model groups (>98.9% for both) were

assembled for downstream analysis. The clean reads were mapped to the reference genome (Genome assembly: GRCm38.p6, [http://www.ensembl.org/Mus\\_musculus/Info/Index](http://www.ensembl.org/Mus_musculus/Info/Index)) and the detailed mapping output is summarized in the following Table A.

Table A. Summary of trimming and read mapping results of the sequences generated from the skin samples with or without the injection of *Staphylococcus aureus*.

| Sample   | Raw reads  | Clean reads | Total reads | Total mapped       | Multiple mapped  | Uniquely mapped    |
|----------|------------|-------------|-------------|--------------------|------------------|--------------------|
| Control1 | 45,022,032 | 44,445,246  | 44,445,246  | 42,720,677(96.12%) | 3,242,878(7.3%)  | 39,477,799(88.82%) |
| Control2 | 44,633,900 | 44,348,374  | 44,348,374  | 42,988,527(96.93%) | 3,280,302(7.4%)  | 39,708,225(89.54%) |
| Control3 | 44,768,108 | 44,227,922  | 44,227,922  | 42,503,298(96.1%)  | 3,238,662(7.32%) | 39,264,636(88.78%) |
| Model1   | 43,619,658 | 43,337,052  | 43,337,052  | 41,713,031(96.25%) | 2,676,494(6.18%) | 39,036,537(90.08%) |
| Model2   | 44,876,888 | 44,364,064  | 44,364,064  | 42,687,638(96.22%) | 2,632,583(5.93%) | 40,055,055(90.29%) |
| Model3   | 44,517,200 | 44,270,602  | 44,270,602  | 42,717,763(96.49%) | 2,922,110(6.6%)  | 39,795,653(89.89%) |

**Note:** Control represents the skin sample of mice without the injection of *Staphylococcus aureus*; Model represents the skin sample of mice with the injection of *Staphylococcus aureus*. Three replicates of Control (Control-1, -2 and -3) and Model (Model-1, -2 and -3) treatments were carried out in RNA-seq analysis.

#### Reference

1. Li B, Dewey CN. RSEM: accurate transcript quantification from RNA-Seq data with or without a reference genome. *BMC Bioinformatics* 2011; 12:323. DOI: 10.1186/1471-2105-12-323.
2. Wang L, Feng Z, Wang X, et al. DEGseq: an R package for identifying differentially expressed genes from RNA-seq data. *Bioinformatics*, 2009, 26(1): 136-138. DOI:10.1093/bioinformatics/btp612





Fig. S3

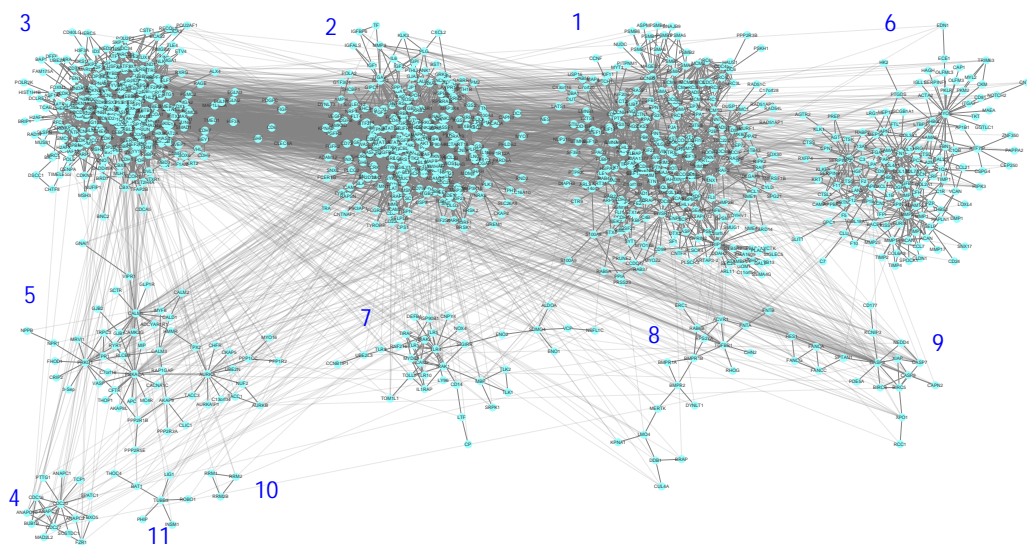

**Table S1 Primer pairs of genes validated by qRT-PCR**

| Gene symbol | Sequence (5' - 3')         | Length | Tm   |
|-------------|----------------------------|--------|------|
| Nox4        | F: GAAGGGGTAAACACCTCTGC    | 21     | 60.6 |
|             | R: ATGCTCTGCTTAAACACAATCCT | 23     | 60.2 |
| Mmn1        | F: GGTCTTCAGGCTTACCAACAC   | 21     | 60.6 |
|             | R: GAGTGGCCGAGAGCACTTG     | 19     | 62.7 |
| Mcm5        | F: CAGAGGCGATTCAAGGAGTTC   | 21     | 60.4 |
|             | R: CGATCCAGTATTCACCCAGGT   | 21     | 61.0 |
| Msx1        | F: TGCTGCTATGACTTCTTTGCC   | 21     | 60.6 |
|             | R: GCTTCCTGTGATCGGCCAT     | 19     | 62.1 |
| Fgf5        | F: AAGTAGCGCGACGTTTTCTTC   | 21     | 61.2 |
|             | R: CTGGAAACTGCTATGTTCCGAG  | 22     | 60.7 |

**Table S2 GO clustering results of up-regulated DEGs**

| Categories                                                                 | Term                                                                               | Count | P-Value  |
|----------------------------------------------------------------------------|------------------------------------------------------------------------------------|-------|----------|
| Annotation Cluster 1 Acute-Phase Response                                  |                                                                                    |       |          |
| Enrichment Score: 3.06                                                     |                                                                                    |       |          |
| BP                                                                         | GO:0006953: acute-phase response                                                   | 7     | 5.62E-06 |
| CC                                                                         | GO:0034364: high-density lipoprotein particle                                      | 4     | 2.69E-03 |
| MF                                                                         | GO:0042056: chemoattractant activity                                               | 3     | 4.39E-02 |
| Annotation Cluster 2 Chemotaxis                                            |                                                                                    |       |          |
| Enrichment Score: 2.86                                                     |                                                                                    |       |          |
| BP                                                                         | GO:0060326: cell chemotaxis                                                        | 9     | 8.24E-06 |
| BP                                                                         | GO:0006935: chemotaxis                                                             | 10    | 2.54E-05 |
| MF                                                                         | GO:0005125: cytokine activity                                                      | 8     | 2.56E-02 |
| MF                                                                         | GO:0008009: chemokine activity                                                     | 4     | 2.65E-02 |
| BP                                                                         | GO:0070098: chemokine-mediated signaling pathway                                   | 4     | 3.54E-02 |
| Annotation Cluster 3 Negative Regulation of Inflammation Factor Production |                                                                                    |       |          |
| Enrichment Score: 2.12                                                     |                                                                                    |       |          |
| BP                                                                         | GO:0032689: negative regulation of interferon-gamma production                     | 5     | 3.98E-04 |
| BP                                                                         | GO:0032720: negative regulation of tumor necrosis factor production                | 4     | 0.019    |
| BP                                                                         | GO:0032715: negative regulation of interleukin-6 production                        | 3     | 0.059    |
| Annotation Cluster 4 Lipid Metabolism                                      |                                                                                    |       |          |
| Enrichment Score: 2.00                                                     |                                                                                    |       |          |
| CC                                                                         | GO:0042627: chylomicron                                                            | 4     | 6.26E-04 |
| MF                                                                         | GO:0060230: lipoprotein lipase activator activity                                  | 3     | 0.001    |
| BP                                                                         | GO:0010916: negative regulation of very-low-density lipoprotein particle clearance | 3     | 0.002    |
| CC                                                                         | GO:0034363: intermediate-density lipoprotein particle                              | 3     | 0.002    |
| CC                                                                         | GO:0034361: very-low-density lipoprotein particle                                  | 4     | 0.002    |
| BP                                                                         | GO:0048261: negative regulation of receptor-mediated endocytosis                   | 3     | 0.002    |
| MF                                                                         | GO:0055102: lipase inhibitor activity                                              | 3     | 0.003    |
| BP                                                                         | GO:0034382: chylomicron remnant clearance                                          | 3     | 0.003    |
| CC                                                                         | GO:0034366: spherical high-density lipoprotein particle                            | 3     | 0.005    |
| BP                                                                         | GO:0070328: triglyceride homeostasis                                               | 4     | 0.005    |
| BP                                                                         | GO:0010898: positive regulation of triglyceride catabolic process                  | 3     | 0.007    |
| BP                                                                         | GO:0051006: positive regulation of lipoprotein lipase activity                     | 3     | 0.009    |
| BP                                                                         | GO:0006869: lipid transport                                                        | 6     | 0.015    |
| BP                                                                         | GO:0033700: phospholipid efflux                                                    | 3     | 0.018    |
| BP                                                                         | GO:0001523: retinoid metabolic process                                             | 3     | 0.025    |

**Note:** Count represents the gene number.

**Abbreviations:** DEGs, differential expressed genes; BP, biological process; CC, cell component; MF, molecular function.

**Table S3 GO clustering results of down-regulated DEGs**

| Categories                                        | Term                                            | Count | <i>P</i> -Value |
|---------------------------------------------------|-------------------------------------------------|-------|-----------------|
| Annotation Cluster 1 Cell Cycle                   |                                                 |       |                 |
| Enrichment Score: 39.15                           |                                                 |       |                 |
| BP                                                | GO:0007049: cell cycle                          | 65    | 2.58E-42        |
| BP                                                | GO:0051301: cell division                       | 52    | 2.87E-39        |
| BP                                                | GO:0007067: mitotic nuclear division            | 46    | 4.73E-38        |
| Annotation Cluster 2 Chromosome Segregation       |                                                 |       |                 |
| Enrichment Score: 20.58                           |                                                 |       |                 |
| BP                                                | GO:0007067: mitotic nuclear division            | 46    | 4.73E-38        |
| CC                                                | GO:0000775: chromosome, centromeric region      | 25    | 1.69E-20        |
| CC                                                | GO:0005694: chromosome                          | 34    | 8.92E-20        |
| BP                                                | GO:0007059: chromosome segregation              | 20    | 7.50E-19        |
| CC                                                | GO:0000776: kinetochore                         | 22    | 2.45E-18        |
| CC                                                | GO:0000777: condensed chromosome kinetochore    | 15    | 2.59E-12        |
| Annotation Cluster 3 Structural Molecule          |                                                 |       |                 |
| Enrichment Score: 9.10                            |                                                 |       |                 |
| CC                                                | GO:0005882: intermediate filament               | 16    | 2.14E-11        |
| CC                                                | GO:0045095: keratin filament                    | 14    | 4.56E-10        |
| MF                                                | GO:0005198: structural molecule activity        | 17    | 5.07E-08        |
| Annotation Cluster 4 Microtubule-Based Movement   |                                                 |       |                 |
| Enrichment Score: 8.72                            |                                                 |       |                 |
| CC                                                | GO:0005874: microtubule                         | 24    | 3.04E-11        |
| CC                                                | GO:0005871: kinesin complex                     | 12    | 3.94E-11        |
| BP                                                | GO:0007018: microtubule-based movement          | 13    | 1.43E-10        |
| MF                                                | GO:0003777: microtubule motor activity          | 13    | 1.73E-10        |
| MF                                                | GO:0008017: microtubule binding                 | 18    | 6.19E-10        |
| BP                                                | GO:0007080: mitotic metaphase plate congression | 9     | 5.25E-09        |
| MF                                                | GO:0016887: ATPase activity                     | 10    | 9.77E-04        |
| Annotation Cluster 5 Melanin Biosynthetic Process |                                                 |       |                 |
| Enrichment Score: 4.42                            |                                                 |       |                 |
| BP                                                | GO:0042438: melanin biosynthetic process        | 6     | 2.83E-07        |
| CC                                                | GO:0033162: melanosome membrane                 | 5     | 1.13E-05        |
| BP                                                | GO:0043473: pigmentation                        | 4     | 0.02            |
| Annotation Cluster 6 DNA Metabolism               |                                                 |       |                 |
| Enrichment Score: 2.21                            |                                                 |       |                 |
| CC                                                | GO:0000793: condensed chromosome                | 5     | 5.23E-04        |
| BP                                                | GO:0006259: DNA metabolic process               | 4     | 0.002           |
| MF                                                | GO:0008022: protein C-terminus binding          | 5     | 0.27            |

**Note:** Count represents the gene number.

**Abbreviations:** DEGs, differential expressed genes; BP, biological process; CC, cell component; MF, molecular function



**Table S4 Detailed information of the hubs.**

| <b>name</b> | <b>Average Shortest PathLength</b> | <b>Betweenness Centrality</b> | <b>Closeness Centrality</b> | <b>Neighborhood Connectivity</b> | <b>Number Of Directed Edges</b> | <b>Degree</b> |
|-------------|------------------------------------|-------------------------------|-----------------------------|----------------------------------|---------------------------------|---------------|
| CDK1        | 2.67030717                         | 0.06518027                    | 0.37448875                  | 15.36134454                      | 119                             | 119           |
| TP53        | 2.52354949                         | 0.06261685                    | 0.39626724                  | 25.15740741                      | 108                             | 108           |
| BRCA1       | 2.65255973                         | 0.04757682                    | 0.37699434                  | 22.50943396                      | 106                             | 106           |
| ESR1        | 2.66825939                         | 0.0276148                     | 0.37477616                  | 28.51898734                      | 79                              | 79            |
| CSNK2A1     | 2.64368601                         | 0.04554386                    | 0.37825975                  | 22.11267606                      | 71                              | 71            |
| CREBBP      | 2.72696246                         | 0.01900886                    | 0.36670839                  | 27.37681159                      | 69                              | 69            |
| AR          | 2.65324232                         | 0.01944033                    | 0.37689735                  | 31.47826087                      | 69                              | 69            |
| SMAD3       | 2.74266212                         | 0.02305794                    | 0.36460926                  | 26.26470588                      | 68                              | 68            |
| EP300       | 2.76723549                         | 0.013427                      | 0.36137148                  | 29.21212121                      | 66                              | 66            |
| EGFR        | 2.73242321                         | 0.02619649                    | 0.36597552                  | 25.83076923                      | 65                              | 65            |
| GRB2        | 2.84095563                         | 0.0216046                     | 0.35199423                  | 21.71428571                      | 63                              | 63            |
| RB1         | 2.76518771                         | 0.01842844                    | 0.3616391                   | 25.98412698                      | 63                              | 63            |
| PRKCA       | 2.74607509                         | 0.0353015                     | 0.3641561                   | 19.86666667                      | 60                              | 60            |
| MAPK1       | 2.75017065                         | 0.01592446                    | 0.3636138                   | 27.62711864                      | 59                              | 59            |
| SHC1        | 2.86348123                         | 0.01143227                    | 0.34922527                  | 26.98113208                      | 53                              | 53            |
| YWHA G      | 2.79590444                         | 0.02318452                    | 0.35766602                  | 20.54716981                      | 53                              | 53            |
| FYN         | 2.78566553                         | 0.01822229                    | 0.35898064                  | 25.75471698                      | 53                              | 53            |
| CDK2        | 2.98225256                         | 0.01346032                    | 0.33531701                  | 20.83018868                      | 53                              | 53            |
| STAT3       | 2.81638225                         | 0.01403299                    | 0.35506544                  | 29.80769231                      | 52                              | 52            |
| PIK3R1      | 2.82116041                         | 0.0143178                     | 0.35446407                  | 27.46                            | 50                              | 50            |
| ABL1        | 2.6996587                          | 0.02424667                    | 0.37041719                  | 31.53061224                      | 49                              | 49            |
| SMAD2       | 2.8116041                          | 0.01425885                    | 0.35566885                  | 28.67346939                      | 49                              | 49            |
| CASP3       | 2.81911263                         | 0.01322838                    | 0.35472155                  | 23.48979592                      | 49                              | 49            |
| HDAC1       | 2.85802048                         | 0.0112794                     | 0.34989252                  | 28.32653061                      | 49                              | 49            |
| CTNNB1      | 2.77201365                         | 0.01830074                    | 0.36074858                  | 29.32653061                      | 49                              | 49            |
| RELA        | 2.81023891                         | 0.00879414                    | 0.35584163                  | 31.02083333                      | 48                              | 48            |
| PLK1        | 3.02662116                         | 0.02026808                    | 0.33040144                  | 13.27659574                      | 47                              | 47            |
| SMAD4       | 2.79385666                         | 0.01458847                    | 0.35792817                  | 29.02222222                      | 45                              | 45            |
| SP1         | 2.84163823                         | 0.0069641                     | 0.35190968                  | 34.66666667                      | 45                              | 45            |
| PRKACA      | 2.97474403                         | 0.01611233                    | 0.33616338                  | 17.04545455                      | 44                              | 44            |
| LCK         | 2.85802048                         | 0.00750143                    | 0.34989252                  | 28.90909091                      | 44                              | 44            |
| NR3C1       | 2.84914676                         | 0.00856867                    | 0.35098227                  | 30.18181818                      | 44                              | 44            |
| STAT1       | 2.87167235                         | 0.01158159                    | 0.34822914                  | 28.13636364                      | 44                              | 44            |

|              |            |            |            |             |    |    |
|--------------|------------|------------|------------|-------------|----|----|
| JUN          | 2.85187713 | 0.00606078 | 0.35064624 | 33.25       | 44 | 44 |
| TRIP13       | 3.39249147 | 0.02728862 | 0.29476861 | 4.86046512  | 43 | 43 |
| PTPN11       | 2.98020478 | 0.00598381 | 0.33554741 | 28.19047619 | 42 | 42 |
| MAPK3        | 2.87235495 | 0.0064558  | 0.34814639 | 26.0952381  | 42 | 42 |
| AKT1         | 2.82798635 | 0.00810623 | 0.3536085  | 29.76190476 | 42 | 42 |
| PRKCD        | 2.84163823 | 0.01008381 | 0.35190968 | 28.95121951 | 41 | 41 |
| CBL          | 2.96518771 | 0.00783802 | 0.33724678 | 29.95121951 | 41 | 41 |
| VIM          | 2.87849829 | 0.01468694 | 0.34740337 | 20.6        | 40 | 40 |
| LYN          | 2.88600683 | 0.01024751 | 0.34649953 | 26.23076923 | 39 | 39 |
| PTPN6        | 2.94334471 | 0.00842894 | 0.33974954 | 28.33333333 | 39 | 39 |
| MYC          | 2.88327645 | 0.00633811 | 0.34682765 | 32.23076923 | 39 | 39 |
| SYK          | 2.98225256 | 0.01019946 | 0.33531701 | 26.25641026 | 39 | 39 |
| MYOC         | 3.19317406 | 0.02182762 | 0.31316802 | 7.47368421  | 38 | 38 |
| RAF1         | 2.89010239 | 0.00776477 | 0.3460085  | 30.36842105 | 38 | 38 |
| CDKN1<br>A   | 2.92354949 | 0.00742643 | 0.34204996 | 27.54054054 | 37 | 37 |
| YWHAZ        | 2.89078498 | 0.00798263 | 0.3459268  | 25.47222222 | 36 | 36 |
| PCNA         | 3.07372014 | 0.00821515 | 0.32533866 | 20.80555556 | 36 | 36 |
| TGFBR1       | 2.92354949 | 0.01531915 | 0.34204996 | 21.22222222 | 36 | 36 |
| MDM2         | 2.90375427 | 0.00882197 | 0.34438176 | 32.13888889 | 36 | 36 |
| UBE2I        | 2.92696246 | 0.01486245 | 0.34165112 | 26.51428571 | 35 | 35 |
| PIN1         | 2.84163823 | 0.01186664 | 0.35190968 | 28.28571429 | 35 | 35 |
| PLCG1        | 3.04982935 | 0.00659668 | 0.3278872  | 25.6        | 35 | 35 |
| MMP2         | 3.378157   | 0.01535252 | 0.2960194  | 8.38235294  | 34 | 34 |
| TRAF2        | 3.1003413  | 0.01407148 | 0.32254513 | 14.02941176 | 34 | 34 |
| FN1          | 3.17952218 | 0.01858716 | 0.31451267 | 12.88235294 | 34 | 34 |
| PTK2         | 2.94744027 | 0.0054353  | 0.33927744 | 30.18181818 | 33 | 33 |
| CAV1         | 2.87372014 | 0.01425034 | 0.347981   | 30.42424242 | 33 | 33 |
| JAK2         | 2.95290102 | 0.0037805  | 0.33865002 | 33.45454545 | 33 | 33 |
| CSNK2<br>A2  | 2.98225256 | 0.0063947  | 0.33531701 | 19.125      | 32 | 32 |
| VAV1         | 3.00409556 | 0.00491544 | 0.33287889 | 28.59375    | 32 | 32 |
| NFKB1        | 2.98430034 | 0.00304166 | 0.33508692 | 29.3125     | 32 | 32 |
| CALM1        | 2.97952218 | 0.01747462 | 0.33562428 | 21.4375     | 32 | 32 |
| IRS1         | 2.96518771 | 0.00384899 | 0.33724678 | 32.32258065 | 31 | 31 |
| STAT5A       | 2.96791809 | 0.00208742 | 0.33693652 | 36.48387097 | 31 | 31 |
| GSK3B        | 2.99658703 | 0.00388009 | 0.33371298 | 24.87096774 | 31 | 31 |
| KAT5         | 2.90170648 | 0.00598959 | 0.34462479 | 34.36666667 | 30 | 30 |
| YWHAB        | 2.99249147 | 0.00333619 | 0.33416971 | 24.23333333 | 30 | 30 |
| PML          | 2.9331058  | 0.00338986 | 0.34093554 | 35.36666667 | 30 | 30 |
| HSP90A<br>A1 | 2.821843   | 0.01119515 | 0.35437833 | 37.73333333 | 30 | 30 |
| RXRA         | 3.00887372 | 0.00524478 | 0.33235027 | 25.1        | 30 | 30 |

|            |            |            |            |             |    |    |
|------------|------------|------------|------------|-------------|----|----|
| TBP        | 3.0559727  | 0.00299006 | 0.32722805 | 28.03333333 | 30 | 30 |
| ZBTB16     | 2.94129693 | 0.01127089 | 0.33998608 | 28.43333333 | 30 | 30 |
| XRCC6      | 2.9665529  | 0.00951465 | 0.33709158 | 26.31034483 | 29 | 29 |
| YWHAE      | 2.96109215 | 0.00436169 | 0.33771323 | 25          | 29 | 29 |
| UBB        | 2.89829352 | 0.00575859 | 0.34503062 | 32.10344828 | 29 | 29 |
| CASP8      | 2.96996587 | 0.00442019 | 0.33670421 | 27.44827586 | 29 | 29 |
| PDGFR<br>B | 3.09897611 | 0.00253878 | 0.32268722 | 29.72413793 | 29 | 29 |
| NFKBIA     | 2.98225256 | 0.00577504 | 0.33531701 | 25.51724138 | 29 | 29 |
| CCNB1      | 3.04505119 | 0.00688436 | 0.3284017  | 22.79310345 | 29 | 29 |
| MCM10      | 3.4552901  | 0.00386625 | 0.2894113  | 13.78571429 | 28 | 28 |
| EWSR1      | 2.9774744  | 0.01836635 | 0.33585511 | 18          | 28 | 28 |
| SUMO1      | 3.06006826 | 0.0051607  | 0.3267901  | 25.14285714 | 28 | 28 |
| UBQLN<br>4 | 3.07235495 | 0.01300429 | 0.32548323 | 13.89285714 | 28 | 28 |
| MCM7       | 3.27576792 | 0.00316274 | 0.30527193 | 18.28571429 | 28 | 28 |
| RAD51      | 3.07576792 | 0.01099833 | 0.32512206 | 23.07142857 | 28 | 28 |
| IGFBP3     | 3.0996587  | 0.01347889 | 0.32261616 | 14.75       | 28 | 28 |
| CRK        | 3.04846416 | 0.00280804 | 0.32803403 | 30.44444444 | 27 | 27 |
| ATM        | 3.13651877 | 0.00237084 | 0.31882481 | 23.51851852 | 27 | 27 |
| PIAS1      | 2.98156997 | 0.00184852 | 0.33539377 | 34.03703704 | 27 | 27 |
| HDAC2      | 3.01023891 | 0.00370765 | 0.33219955 | 28.33333333 | 27 | 27 |
| CCNA2      | 3.08805461 | 0.00416521 | 0.32382847 | 27.77777778 | 27 | 27 |
| CCND1      | 2.96109215 | 0.00529778 | 0.33771323 | 34.85185185 | 27 | 27 |
| IGF1R      | 2.98225256 | 0.00781287 | 0.33531701 | 29.25925926 | 27 | 27 |
| KNG1       | 3.41501706 | 0.01077378 | 0.29282431 | 9.22222222  | 27 | 27 |
| MAPK1<br>4 | 2.99453925 | 0.00248359 | 0.33394119 | 27.40740741 | 27 | 27 |
| SMAD1      | 3.0662116  | 0.00696736 | 0.32613535 | 22.14814815 | 27 | 27 |
| CDKN1<br>B | 3.03208191 | 0.00441235 | 0.32980639 | 27.26923077 | 26 | 26 |
| KDR        | 3.09419795 | 0.00816904 | 0.32318553 | 24.73076923 | 26 | 26 |
| ATXN1      | 3.02525597 | 0.0083183  | 0.33055054 | 18.30769231 | 26 | 26 |
| FLNA       | 2.9112628  | 0.01142461 | 0.34349355 | 22          | 26 | 26 |
| E2F1       | 3.06211604 | 0.00160328 | 0.32657156 | 33.19230769 | 26 | 26 |
| PRKG1      | 3.27849829 | 0.00600271 | 0.3050177  | 9.76        | 25 | 25 |
| CDK4       | 3.09488055 | 0.00367651 | 0.32311425 | 25.88       | 25 | 25 |
| ACTB       | 3.04505119 | 0.00737685 | 0.3284017  | 18.16       | 25 | 25 |
| BCR        | 3.03481229 | 0.00212821 | 0.32950967 | 33.28       | 25 | 25 |
| CHEK1      | 3.05802048 | 0.00406268 | 0.32700893 | 25.56       | 25 | 25 |
| BTK        | 2.97542662 | 0.00865862 | 0.33608626 | 28.84       | 25 | 25 |
| PPP1CA     | 3.03208191 | 0.00717457 | 0.32980639 | 26.88       | 25 | 25 |
| PDGFR      | 3.24982935 | 0.00406691 | 0.30770846 | 21.48       | 25 | 25 |

|              |            |            |            |             |    |    |
|--------------|------------|------------|------------|-------------|----|----|
| A            |            |            |            |             |    |    |
| PPP2CA       | 3.01979522 | 0.01089583 | 0.33114828 | 27.91666667 | 24 | 24 |
| RASA1        | 3.09419795 | 0.00424925 | 0.32318553 | 29.875      | 24 | 24 |
| BARD1        | 3.12354949 | 0.00382426 | 0.3201486  | 22.5        | 24 | 24 |
| HIF1A        | 3.00409556 | 0.00717564 | 0.33287889 | 34.58333333 | 24 | 24 |
| STAT5B       | 3.08600683 | 9.51E-04   | 0.32404335 | 33.41666667 | 24 | 24 |
| SVIL         | 3.04573379 | 0.01170591 | 0.3283281  | 16.29166667 | 24 | 24 |
| PIAS4        | 3.05460751 | 0.00260673 | 0.3273743  | 29.75       | 24 | 24 |
| YWHA<br>H    | 3.08054608 | 0.00696476 | 0.32461777 | 25.54166667 | 24 | 24 |
| ATN1         | 3.15699659 | 0.00918998 | 0.31675676 | 12.83333333 | 24 | 24 |
| NCOR2        | 3.09624573 | 0.00122534 | 0.32297178 | 30.54166667 | 24 | 24 |
| BCL2         | 2.97610922 | 0.00292659 | 0.33600917 | 32.73913043 | 23 | 23 |
| AURKA        | 3.14880546 | 0.00971948 | 0.31758075 | 19.7826087  | 23 | 23 |
| CHUK         | 2.97474403 | 0.00202717 | 0.33616338 | 35.82608696 | 23 | 23 |
| CDC25C       | 3.00409556 | 0.00384551 | 0.33287889 | 29.86956522 | 23 | 23 |
| APP          | 3.03412969 | 0.00945352 | 0.3295838  | 22.34782609 | 23 | 23 |
| EEF1A1       | 3.01365188 | 0.00833138 | 0.33182333 | 21.52173913 | 23 | 23 |
| MCM2         | 3.45119454 | 0.00120939 | 0.28975475 | 17.65217391 | 23 | 23 |
| PTPN1        | 2.94607509 | 0.00184931 | 0.33943466 | 41.39130435 | 23 | 23 |
| POU2F1       | 3.13720137 | 0.00244616 | 0.31875544 | 29.86956522 | 23 | 23 |
| JAK1         | 3.03617747 | 0.00248688 | 0.32936151 | 33.82608696 | 23 | 23 |
| NCOA1        | 3.11740614 | 8.26E-04   | 0.32077951 | 34.13043478 | 23 | 23 |
| HMGB1        | 2.96177474 | 0.01055407 | 0.3376354  | 29.36363636 | 22 | 22 |
| PLG          | 3.46279863 | 0.01074367 | 0.28878376 | 10.63636364 | 22 | 22 |
| TLR4         | 3.46552901 | 0.00956087 | 0.28855623 | 9.04545455  | 22 | 22 |
| CHD3         | 3.14539249 | 0.00209535 | 0.31792535 | 22.27272727 | 22 | 22 |
| HGS          | 3.07030717 | 0.00566265 | 0.32570031 | 21.63636364 | 22 | 22 |
| SMAD9        | 3.15767918 | 0.00674919 | 0.31668828 | 16.54545455 | 22 | 22 |
| SRF          | 3.14948805 | 0.00193088 | 0.31751192 | 23.68181818 | 22 | 22 |
| PRKCB        | 3.04368601 | 0.00612833 | 0.328549   | 20.31818182 | 22 | 22 |
| SKIL         | 3.14812287 | 0.00589073 | 0.31764961 | 21.68181818 | 22 | 22 |
| CHEK2        | 3.19590444 | 0.0060305  | 0.31290047 | 24.71428571 | 21 | 21 |
| CDC20        | 3.40204778 | 0.00586971 | 0.29394061 | 12.95238095 | 21 | 21 |
| CDC6         | 3.44368601 | 0.00305429 | 0.29038652 | 19.28571429 | 21 | 21 |
| SKP2         | 3.32559727 | 0.00145107 | 0.30069787 | 19.95238095 | 21 | 21 |
| LEF1         | 3.22116041 | 0.00460632 | 0.31044713 | 21.23809524 | 21 | 21 |
| TNFRSF<br>1A | 3.06484642 | 0.0046247  | 0.32628062 | 30.38095238 | 21 | 21 |
| EZR          | 3.08532423 | 0.00582644 | 0.32411504 | 22.38095238 | 21 | 21 |
| MAPT         | 2.9665529  | 0.002593   | 0.33709158 | 32.04761905 | 21 | 21 |
| PARP1        | 3.1440273  | 0.00503342 | 0.3180634  | 23.71428571 | 21 | 21 |
| CD5          | 3.16450512 | 0.0039935  | 0.31600518 | 24.23809524 | 21 | 21 |

|              |            |            |            |             |    |    |
|--------------|------------|------------|------------|-------------|----|----|
| RBL1         | 3.20546075 | 0.00114501 | 0.31196763 | 28.42857143 | 21 | 21 |
| THBS1        | 3.58156997 | 0.00429665 | 0.27920717 | 14.61904762 | 21 | 21 |
| CSNK2<br>B   | 2.9447099  | 0.00448107 | 0.33959203 | 40          | 21 | 21 |
| PLSCR1       | 3.14061433 | 0.00645011 | 0.31840904 | 19.38095238 | 21 | 21 |
| YWHA<br>Q    | 3.04982935 | 0.00473007 | 0.3278872  | 21.28571429 | 21 | 21 |
| ZAP70        | 3.23549488 | 0.00176937 | 0.30907173 | 28          | 21 | 21 |
| KRT18        | 2.96450512 | 0.00350686 | 0.33732443 | 36.57142857 | 21 | 21 |
| C1orf10<br>3 | 3.30784983 | 0.00296971 | 0.30231118 | 13.71428571 | 21 | 21 |
| MCM3         | 3.38771331 | 0.00226063 | 0.29518436 | 19.47619048 | 21 | 21 |
| KHDRB<br>S1  | 2.98156997 | 0.00773879 | 0.33539377 | 39.47619048 | 21 | 21 |
| RACGA<br>P1  | 3.29897611 | 0.00723803 | 0.30312435 | 12.2        | 20 | 20 |
| TUBA4<br>A   | 3.01501706 | 0.00726483 | 0.33167308 | 28.75       | 20 | 20 |
| TOP2A        | 2.94607509 | 0.00343118 | 0.33943466 | 41.4        | 20 | 20 |
| MDM4         | 3.00887372 | 0.00109124 | 0.33235027 | 43.85       | 20 | 20 |
| CD44         | 3.15767918 | 0.00764187 | 0.31668828 | 19.55       | 20 | 20 |
| ORC2L        | 3.59317406 | 4.70E-04   | 0.27830547 | 17.55       | 20 | 20 |
| HRAS         | 3.15017065 | 0.00347734 | 0.31744312 | 22.75       | 20 | 20 |
